# Supplementary material for: Reductions in HbA1c with Flash Glucose Monitoring Are Sustained for up to 24 Months: A Meta-Analysis of 75 Real-World Observational Studies
Source: PubMed Central journal article supplement — Diabetes Ther. 2022 Apr 27;13(6):1175–85. doi: 10.1007/s13300-022-01253-9 (PMC9174370; doi:10.1007/s13300-022-01253-9), 2022-04-27
Supplement: 13300_2022_1253_MOESM1_ESM.pdf [file 13300_2022_1253_MOESM1_ESM.pdf]

# Reductions in HbA1c with Flash Glucose Monitoring Are Sustained for up to 24 Months: A Meta-Analysis of 75 Real-World Observational Studies

Mark Evans<sup>1</sup>, Zoë Welsh<sup>2</sup> & Alexander Seibold<sup>3</sup>

1. Wellcome Trust/ MRC Institute of Metabolic Science, University of Cambridge and Cambridge University Hospitals NHS Foundation Trust, Cambridge, UK
2. Abbott Diabetes Care, Witney, Oxfordshire, UK
3. Abbott Diabetes Care, Wiesbaden, Germany

Mark Evans MD

[mle24@cam.ac.uk](mailto:mle24@cam.ac.uk)

Zoë Welsh

[zoe.welsh@abbott.com](mailto:zoe.welsh@abbott.com)

Alexander Seibold

[Alexander.seibold@abbott.com](mailto:Alexander.seibold@abbott.com)

## Corresponding Author:

Mark Evans, email: [mle@cam.ac.uk](mailto:mle@cam.ac.uk)

**Supplementary Table 1. Summary of studies with data using flash glucose monitoring included in the meta-analysis**

**Table 1a. Studies with a single timed endpoint**

| Study authors                | Outcomes timepoints (month) | Adults/Children | Type of diabetes | Number of subjects | Initial HbA1c (%) | Change in HbA1c (%) | SE Change in HbA1c (%) |
|------------------------------|-----------------------------|-----------------|------------------|--------------------|-------------------|---------------------|------------------------|
| Al Hayek AA, et al.          | 3                           | adults          | 1                | 95                 | 8.3               | -0.6                | 0.226                  |
| Antich Barcelo C, et al.     | 6                           | adults          | 1                | 231                | 7.3               | -0.3                | 0.118                  |
| Bacon S, et al.              | 3                           | adults          | 1                | 58                 | 8.1               | -0.55               | 0.23                   |
| Batanero R, et al.           | 6                           | adults          | 1                | 41                 | 7.6               | 0.39                | 1.437                  |
| Davis T, et al.              | 6                           | adults          | 1                | 22                 | 8.2               | -0.23               | 0.164                  |
| De Oliveira MCS, et al.      | 3                           | adults          | 1                | 35                 | 8.6               | -0.7                | 0.203                  |
| Fokkert M, et al.            | 12                          | adults          | 1                | 543                | 7.96              | -0.3                | 0.075                  |
| Fonseca L, et al.            | 6                           | adults          | 1                | 35                 | 7.67              | 0.07                | 0.068                  |
| Gernay MM, et al.            | 15                          | adults          | 1                | 645                | 7.96              | -0.15               | 0.073                  |
| Gibb F, et al.               | 12                          | adults          | 1                | 9655               | 8.19              | -0.27               | 0.008                  |
| Gil-Ibáñez MT, et al.        | 12                          | adults          | 1                | 23                 | 7.86              | -0.39               | 0.14                   |
| Guo L, et al.                | 3                           | adults          | 1                | 153                | 7.96              | -0.42               | 0.07                   |
| Hansen KW.                   | 18                          | adults          | 1                | 270                | 7.78              | -0.41               | 0.054                  |
| Hey C, et al.                | 1.5                         | adults          | 1                | 29                 | 9.9               | -0.34               | 0.221                  |
| Holcombe A, et al.           | 2                           | adults          | 1                | 13                 | 9.01              | -0.74               | 0.426                  |
| Kramer G, et al.             | 12                          | adults          | 1                | 40                 | 7.4               | -0.04               | 0.111                  |
| Lázaro-Martín L, et al.      | 6                           | adults          | 1                | 19                 | 7.34              | -0.12               | 0.112                  |
| Mitchell K, et al.           | 3                           | adults          | 1                | 13                 | 10.28             | -0.88               | 0.17                   |
| Moreno-Fernandez J, et al.   | 6                           | adults          | 1                | 18                 | 7.4               | -0.4                | 0.094                  |
| Muthabathula J, et al.       | 5.3                         | adults          | 1                | 114                | 8.39              | -0.76               | 0.09                   |
| Overend L, et al.            | 6                           | adults          | 1                | 37                 | 8.77              | -1.08               | 0.234                  |
| Piedra M, et al.             | 12                          | adults          | 1                | 41                 | 7.6               | -0.16               | 0.123                  |
| Reddy M, et al.              | 2                           | adults          | 1                | 20                 | 7.2               | -0.35               | 0.143                  |
| Scorsone A, et al.           | 6                           | adults          | 1                | 20                 | 8.5               | -0.8                | 0.212                  |
| Surendran A, et al.          | 6                           | adults          | 1                | 21                 | 7.55              | -0.58               | 0.329                  |
| Whitehouse P, et al.         | 3                           | adults          | 1                | 11                 | 8.92              | -1.28               | 0.452                  |
| Davis T, et al.              | 6                           | adults          | 2                | 7                  | 7.8               | -0.04               | 0.249                  |
| De Lourdes Machado M, et al. | 3                           | adults          | 2                | 18                 | 9.6               | -1.5                | 0.377                  |
| Fasching P, et al.           | 4.5                         | adults          | 2                | 92                 | 8.76              | -0.88               | 0.084                  |
| Fokkert M, et al.            | 12                          | adults          | 2                | 99                 | 8.39              | -0.57               | 0.189                  |
| Hanaire H, et al.            | 4.5                         | adults          | 2                | 88                 | 8.99              | -0.81               | 0.122                  |
| Ida S, et al.                | 3                           | adults          | 2                | 48                 | 7.7               | -0.3                | 0.13                   |
| Kröger J, et al.             | 4.5                         | adults          | 2                | 183                | 8.84              | -0.92               | 0.083                  |
| Yaron M, et al.              | 2.5                         | adults          | 2                | 53                 | 8.68              | -0.82               | 0.115                  |
| Al Hayek AA, et al.          | 3                           | children        | 1                | 187                | 8.2               | -0.3                | 0.08                   |
| Al Hayek AA, et al.          | 3                           | children        | 1                | 47                 | 8.5               | -0.66               | 0.238                  |
| Al Hayek AA, et al.          | 3                           | children        | 1                | 47                 | 8.42              | -0.33               | 0.128                  |
| Aravamudhan A, et al.        | 6                           | children        | 1                | 22                 | 8.92              | -0.68               | 0.133                  |
| Boucher S, et al.            | 6                           | children        | 1                | 33                 | 10.75             | -0.72               | 0.35                   |
| Campbell FM, et al.          | 2                           | children        | 1                | 75                 | 7.9               | -0.4                | 0.069                  |
| Costigan C, et al.           | 6                           | children        | 1                | 108                | 8                 | -0.3                | 0.096                  |
| Helm N, et al.               | 2                           | children        | 1                | 31                 | 7.42              | -0.22               | 0.111                  |
| Masel A, et al.              | 3                           | children        | 1                | 10                 | 7.38              | -0.1                | 0.162                  |
| Messaoui A, et al.           | 12                          | children        | 1                | 278                | 7.8               | 0.1                 | 0.066                  |
| Quirós C, et al.             | 6                           | children        | 1                | 31                 | 8.4               | -0.5                | 0.198                  |
| Tirelli E, et al.            | 3                           | children        | 1                | 13                 | 9.56              | -1.37               | 0.347                  |
| Xatzipsalti M, et al.        | 3                           | children        | 1                | 51                 | 7.06              | -1                  | 0.269                  |

**Table 1b. Studies with a multiple timed endpoints**

| Study authors          | Outcomes timepoints (month) | Adults/Children | Type of diabetes | Number of subjects | Initial HbA1c (%) | Change in HbA1c (%) | SE Change in HbA1c (%) |
|------------------------|-----------------------------|-----------------|------------------|--------------------|-------------------|---------------------|------------------------|
| Abdalaziz A, et al.    | 6                           | adults          | 1                | 40                 | 8.56              | -0.55               | 0.174                  |
|                        | 12                          | adults          | 1                | 40                 | 8.56              | -0.64               | 0.166                  |
| Bolinder J, et al.     | 3                           | adults          | 1                | 119                | 6.79              | 0.06                | 0.046                  |
|                        | 6                           | adults          | 1                | 119                | 6.79              | 0.16                | 0.047                  |
| Charleer S, et al.     | 6                           | adults          | 1                | 1828               | 7.8               | -0.12               | 0.018                  |
|                        | 12                          | adults          | 1                | 1711               | 7.8               | 0.03                | 0.02                   |
| Dørflinger GH, et al.  | 3                           | adults          | 1                | 209                | 8.31              | -0.51               | 0.05                   |
|                        | 6                           | adults          | 1                | 146                | 8.31              | -0.66               | 0.131                  |
|                        | 9                           | adults          | 1                | 75                 | 8.31              | -0.66               | 0.057                  |
|                        | 12                          | adults          | 1                | 25                 | 8.31              | -0.76               | 0.197                  |
| Eeg-Olofsson K, et al. | 6                           | adults          | 1                | 9187               | 8.1               | -0.36               | 0.013                  |

| Study authors                | Outcomes timepoints (month) | Adults/Children | Type of diabetes | Number of subjects | Initial HbA1c (%) | Change in HbA1c (%) | SE Change in HbA1c (%) |
|------------------------------|-----------------------------|-----------------|------------------|--------------------|-------------------|---------------------|------------------------|
| Greve SV, et al.             | 12                          | adults          | 1                | 8316               | 8.1               | -0.33               | 0.013                  |
|                              | 6                           | adults          | 1                | 122                | 8.01              | -0.37               | 0.06                   |
|                              | 9                           | adults          | 1                | 62                 | 8.1               | -0.18               | 0.084                  |
|                              | 12                          | adults          | 1                | 39                 | 8.01              | -0.37               | 0.105                  |
| Klausmann G, et al.          | 3                           | adults          | 1                | 130                | 8.14              | -0.75               | 0.15                   |
|                              | 6                           | adults          | 1                | 105                | 8.08              | -0.76               | 0.17                   |
|                              | 9                           | adults          | 1                | 89                 | 8.07              | -0.72               | 0.19                   |
|                              | 12                          | adults          | 1                | 67                 | 8.11              | -0.74               | 0.21                   |
| Londahl M, et al.            | 3                           | adults          | 1                | 226                | 8.72              | -0.65               | 0.05                   |
|                              | 12                          | adults          | 1                | 226                | 8.72              | -0.74               | 0.063                  |
|                              | 24                          | adults          | 1                | 226                | 8.72              | -0.81               | 0.071                  |
| Nana M, et al.               | 3                           | adults          | 1                | 72                 | 8.81              | -0.73               | 0.115                  |
|                              | 6                           | adults          | 1                | 27                 | 8.69              | -0.8                | 0.264                  |
| Paris I, et al.              | 3                           | adults          | 1                | 107                | 8.51              | -0.67               | 0.109                  |
|                              | 6                           | adults          | 1                | 109                | 8.51              | -0.68               | 0.117                  |
|                              | 9                           | adults          | 1                | 104                | 8.51              | -0.48               | 0.118                  |
|                              | 12                          | adults          | 1                | 102                | 8.51              | -0.46               | 0.123                  |
| Rodia C, et al.              | 6                           | adults          | 1                | 350                | 7.8               | -0.2                | 0.043                  |
|                              | 12                          | adults          | 1                | 204                | 7.8               | -0.2                | 0.07                   |
|                              | 18                          | adults          | 1                | 39                 | 7.8               | -0.3                | 0.128                  |
| Rouhard S, et al.            | 3                           | adults          | 1                | 172                | 8.1               | -0.3                | 0.091                  |
|                              | 6                           | adults          | 1                | 222                | 8.1               | -0.2                | 0.094                  |
| Tsur A, et al.               | 3                           | adults          | 1                | 1659               | 8.1               | -0.2                | 0.071                  |
|                              | 6                           | adults          | 1                | 1493               | 8.1               | -0.2                | 0.07                   |
|                              | 9                           | adults          | 1                | 1288               | 8.1               | -0.2                | 0.072                  |
|                              | 12                          | adults          | 1                | 904                | 8.1               | -0.3                | 0.166                  |
|                              | 1                           | adults          | 1                | 20                 | 7.46              | -0.18               | 0.084                  |
| Ueno K, et al.               | 3                           | adults          | 1                | 20                 | 7.46              | -0.37               | 0.102                  |
|                              | 3                           | adults          | 1                | 82                 | 9.74              | -0.98               | 0.233                  |
| Yadegarfar G, et al.         | 6                           | adults          | 1                | 82                 | 9.74              | -1.47               | 0.28                   |
|                              | 6                           | adults          | 2                | 711                | 8.6               | -0.5                | 0.054                  |
| Eeg-Olofsson K, et al.       | 12                          | adults          | 2                | 538                | 8.6               | -0.52               | 0.059                  |
|                              | 3                           | adults          | 2                | 149                | 8.65              | -0.44               | 0.08                   |
| Haak T, et al.               | 6                           | adults          | 2                | 149                | 8.65              | -0.27               | 0.083                  |
|                              | 3                           | adults          | 2                | 145                | 7.78              | -0.54               | 0.11                   |
| Klausmann G, et al.          | 6                           | adults          | 2                | 115                | 7.59              | -0.43               | 0.11                   |
|                              | 9                           | adults          | 2                | 82                 | 7.5               | -0.39               | 0.13                   |
|                              | 12                          | adults          | 2                | 44                 | 7.55              | -0.38               | 0.17                   |
|                              | 6                           | adults          | 2                | 774                | 8.5               | -0.8                | 0.059                  |
| Miller E, et al.             | 12                          | adults          | 2                | 207                | 8.5               | -0.6                | 0.108                  |
|                              | 3                           | adults          | 2                | 48                 | 7.83              | -0.43               | 0.07                   |
| Wada E, et al.               | 6                           | adults          | 2                | 48                 | 7.83              | -0.46               | 0.067                  |
|                              | 3                           | children        | 1                | 102                | 8.56              | -0.35               | 0.058                  |
| Campbell F, et al.           | 6                           | children        | 1                | 102                | 8.56              | -0.4                | 0.067                  |
|                              | 6                           | children        | 1                | 137                | 7.16              | 0.1                 | 0.077                  |
| Charleer S, et al.           | 12                          | children        | 1                | 134                | 7.16              | 0.46                | 0.112                  |
|                              | 24                          | children        | 1                | 122                | 7.16              | 0.4                 | 0.1                    |
|                              | 3                           | children        | 1                | 59                 | 8.86              | -0.81               | 0.031                  |
| Landau Z, et al.             | 6                           | children        | 1                | 59                 | 8.2               | -0.9                | 0.06                   |
|                              | 12                          | children        | 1                | 59                 | 8.2               | -0.7                | 0.03                   |
|                              | 1                           | children        | 1                | 51                 | 7.15              | -0.17               | 0.182                  |
| Leiva-Gea I, et al.          | 3                           | children        | 1                | 108                | 7.09              | 0.07                | 0.096                  |
|                              | 6                           | children        | 1                | 84                 | 7.06              | 0.17                | 0.273                  |
|                              | 2                           | children        | 1                | 33                 | 11.4              | -0.5                | 0.435                  |
| Piccoli C, et al.            | 4                           | children        | 1                | 33                 | 11.4              | -0.4                | 0.453                  |
|                              | 3                           | children        | 1                | 52                 | 8.12              | -0.52               | 0.2                    |
| Pintus D, et al.             | 6                           | children        | 1                | 36                 | 8.26              | -0.38               | 0.261                  |
|                              | 12                          | children        | 1                | 30                 | 8.18              | -0.2                | 0.294                  |
|                              | 3                           | children        | 1                | 47                 | 7.93              | -0.09               | 0.079                  |
| Walton-Betancourth S, et al. | 6                           | children        | 1                | 44                 | 7.93              | -0.18               | 0.085                  |
|                              | 9                           | children        | 1                | 36                 | 7.93              | -0.17               | 0.107                  |
|                              | 12                          | children        | 1                | 36                 | 7.93              | -0.19               | 0.112                  |
|                              | 15                          | children        | 1                | 31                 | 7.93              | 0.04                | 0.099                  |
|                              | 3                           | children        | 1                | 72                 | 7.7               | -0.2                | 0.1                    |
| Wijnands A, et al.           | 8                           | children        | 1                | 72                 | 7.7               | 0.2                 | 0.1                    |

## References, Supplementary Table 1

1. Al Hayek AA, et al. Assessing Diabetes Distress and Sleep Quality in Young Adults with Type 1 Diabetes Using FreeStyle Libre: A Prospective Cohort Study. *Diabetes Ther.* 2020 Jul;11(7):1551-1562. doi:10.1007/s13300-020-00849-3. Epub 2020 Jun 4
2. Antich Barcelo C, et al. Implementation of flash glucose monitoring system in type 1 diabetes in a reference hospital: results after 6 months follow up. *Diabetes Technol Ther.* Feb 2020.A-1-A-250. Abstract ID 643 doi. 10.1089/dia.2020.2525.abstracts
3. Bacon S, et al. The performance and Technical usability of a Flash Glucometer Monitoring System. *J Med Sci.* 2017;186(9):S357 Poster. 10.1007/s11845-017-1670-4
4. Batanero R, et al. Impact of flash glucose monitoring on glycemic control and quality of life in adults with type 1 diabetes: a real world study. *Diabetes Technol Ther.* Feb 2020.A-1-A-250. Abstract ID 584 doi. 10.1089/dia.2020.2525.abstracts
5. Davis T, et al. Efficacy of intermittently scanned continuous glucose monitoring in the prevention of recurrent severe hypoglycemia. *Diabetes Technol Ther.* 2020; 22(5):367-373. doi:10.1089/dia.2019.0331+D12
6. De Oliveira MCS, et al. Evaluation of glycemic control in patients with type 1 diabetes with flash continuous glucose monitoring. *Diabetol Metab Syndr.* 2019;11(Suppl 1). doi.org/10.1186/s13098-019-0473-3
7. Fokkert M, et al. Improved well-being and decreased disease burden after 1-year use of flash glucose monitoring (FLARE-NL4). *BMJ Open Diabetes Res Care* 2019 Dec 9;7(1):e000809. doi:10.1136/bmjdr-2019-000809
8. Fonseca L, et al. Flash glucose monitoring decreases time spent in hypoglycemia in type 1 diabetes mellitus: Real world data. *Diabetes Technol Ther.* Vol. 22, No. S1 178 / Abstract ID 690. doi:10.1089/dia.2020.2525.abstracts
9. Gernay MM, et al. The contribution of the freestyle libre® system in the management of diabetic patients: Experience at Liège University hospital. *Rev Med Liege* 2018 Nov; 73 (11):562-569. [www.rmlg.ulg.ac.be/show.php](http://www.rmlg.ulg.ac.be/show.php)
10. Gibb F, et al. Flash Glucose Monitoring is associated with improved glycaemic control and quality of life in people with type 1 diabetes: a large 'real-world' assessment. *Diabetologia* 2018; 61 (Suppl 1):S1–S620 abstract 797. doi.org/10.1007/s00125-018-4693-0
11. Gil-Ibáñez MT, et al. Cost-effectiveness analysis of glycaemic control of a glucose monitoring system (FreeStyle Libre®) for patients with type 1 diabetes in primary health care of Burgos. *Enferm Clin (Engl Ed).* Mar-Apr 2020;30(2):82-88. doi :10.1016/j.enfcli.2019.07.011
12. Guo L, et al. Improved time-in-range and glycemic variability in adults with type 1 diabetes: An analysis of 12-week flash glucose monitoring data from a multicenter prospective trial. *Diabetes* 2020 Jun; 69(Suppl 1): -.2177-PUB. doi: 10.2337/db20-2177-PUB
13. Hansen KW. Effects of unrestricted access to flash glucose monitoring in type 1 diabetes. *Endocrinol Diabetes Metab.* 2020 Mar 19;3930:e00125. doi:10.1002/edm2.125
14. Hey C, et al. Impact of FreeStyle Libre on glycaemic control, frequency of glucose monitoring and treatment satisfaction. 2018 Diabetes UK. 35 (Suppl 1), 36–205 P508. doi:10.1111/dme.13569
15. Holcombe A, et al. Trials of FreeStyle Libre in a local service: impact on diabetes outcomes. *Diab Med,* S1: 2017; 34:160. doi: [https://doi.org/10.1111/dme.37\\_13304](https://doi.org/10.1111/dme.37_13304)
16. Kramer G, et al. Association between Flash Glucose Monitoring and Metabolic Control as well as Treatment Satisfaction in Outpatients with Diabetes Type 1. *Exp Clin Endocrinol Diabetes.* 2021 Mar;129(4):303-308. doi:10.1055/a-0875-3988
17. Lázaro-Martín L, et al. Preliminary experience with the implementation of implantable continuous glucose monitoring use in a single center in Spain. *Diabetes Technol Ther.* 2020 Feb; 386 / Abstract ID 246. doi. 10.1089/dia.2020.2525.abstracts
18. Mitchell K, et al. Trial of FreeStyle Libre flash glucose monitoring (FGM) in patients with poorly controlled Type 1 diabetes. *Diabet Med,* 35:S1: 2018; 160 P398. doi:10.1111/dme.45\_13571

19. Moreno-Fernandez J, et al. Clinical value of Flash glucose monitoring in patients with type 1 diabetes treated with continuous subcutaneous insulin infusion. *Endocrinol Diabetes Nutr (Engl Ed.)* 2018 Dec; 65(10):556-563. doi:10.1016/j.endinu.2018.04.003
20. Muthabathula J, et al. Variation of measured HbA1c from predicted HbA1c on freestyle libre. *Diabetes* 2020 Jun; 69(Suppl 1): -874-P. doi:10.2337/db20-874-P
21. Overend L, et al. Early outcomes of FreeStyle Libre® use in North Cumbria. 2019 Diabetes UK. *Diabet Med.*, 36 (Suppl. 1), 34–82 P424. onlinelibrary.wiley.com/doi/epdf/10.1111/dme.48\_13883
22. Piedra M, et al. Better glycemic outcomes after CSII vs flash glucose monitoring system in type 1 DM patients: A real world single center 1-year prospective follow-up' *Diabetes Technol & Ther.* Feb 2020.A-1-A-250 502 / Abstract ID 524 Volume: 22 Issue S1: February 18, 2020. 10.1089/dia.2020.2525.abstracts
23. Reddy M, et al. A randomized controlled pilot study of continuous glucose monitoring and flash glucose monitoring in people with Type 1 diabetes and impaired awareness of hypoglycaemia. *Diabet Med.* 2018 Apr; 35(4): 483–490. doi:10.1111/dme.13561
24. Scorsone A, et al. Use of flash glucose monitoring for non adjunctive use in type 1 diabetic subjects using carbo counting technique. Poster: [https://simul-europe.com/2018/attd/Files/\(alexscorsone@gmail.com\)POSTER%20ATTD8-ep0120.pdf](https://simul-europe.com/2018/attd/Files/(alexscorsone@gmail.com)POSTER%20ATTD8-ep0120.pdf)
25. Surendran A, et al. Barriers to the uptake of flash glucose monitoring in a London hospital. *Diabet Med.* 2019; 36 (Suppl 1), 34–174, Poster 198. [https://doi.org/10.1111/dme.26\\_13883](https://doi.org/10.1111/dme.26_13883)
26. Whitehouse P, et al. FreeStyle Libre and diabetes distress: a pilot analysis in a real-life secondary care clinic setting. *Practical Diabetes* 2020; 37(3):91-92 doi: 10.1002/pdi.2277
27. Davis T, et al. Efficacy of intermittently scanned continuous glucose monitoring in the prevention of recurrent severe hypoglycemia. *Diabetes Technol Ther.* 2020 May; 22(5):367-373. doi:10.1089/dia.2019.0331
28. De Lourdes Machado M, et al. Reduction in HbA1c using flash glucose monitoring in insulin-treated type 2 diabetes patients in a secondary care setting. *Diabetol Metab Syndr.* 2019, 11(Suppl 1):P236 doi:10.1186/s13098-019-0473-3
29. Fasching P, et al. Effectiveness of FreeStyle Libre Flash Glucose Monitoring System Observed in Real-World, Chart Review Study in Austria, in Adults with Type 2 Diabetes. *Diabetes* 2019; 68(Suppl 1): 96-LB: doi.org/10.2337/db19-96-LB
30. Fokkert M, et al. Improved well-being and decreased disease burden after 1-year use of flash glucose monitoring (FLARE-NL4). *BMJ Open Diabetes Res Care* 2019 Dec 9;7(1):e000809. doi: 10.1136/bmjdr-2019-000809
31. Hanaire H, et al. Real-World, Chart Review Study to Determine the Effectiveness of FreeStyle Libre Flash Glucose Monitoring System, in Adults with Type 2 Diabetes in France *Diabetes* 2019; 68(Suppl 1): 92-LB. doi.org/10.2337/db19-92-LB
32. Ida S, et al. Effects of Flash Glucose Monitoring on Dietary Variety, Physical Activity, and Self-Care Behaviors in Patients with Diabetes. *J Diabetes Res.* 2020; doi: 10.1155/2020/9463648. eCollection 2020
33. Kröger J, et al. Three European Retrospective Real-World Chart Review Studies to Determine the Effectiveness of Flash Glucose Monitoring on HbA1c in Adults with Type 2 Diabetes. *Diabetes Ther.* 2020 Jan;11(1):279-291. doi:10.1007/s13300-019-00741-9
34. Yaron M, et al. Intervention of the Flash Glucose Sensing Technology on Glycemic Control and Treatment Satisfaction in Patients with Type 2 Diabetes Treated Intensively by Insulin—A Randomized Control Trial. *Diabetes* 2018 Jul; 67(Suppl 1). doi:10.2337/db18-908-P
35. Al Hayek AA, et al. Effectiveness of the Freestyle Libre Flash Glucose Monitoring System on Diabetes Distress Among Individuals with Type 1 Diabetes: A Prospective Study. *Diabetes Ther.* 2020 Apr;11(4):927-937. 10.1007/s13300-020-00793-2
36. Al Hayek AA, et al. Differences of FreeStyle Libre Flash Glucose Monitoring System and Finger Pricks on Clinical Characteristics and Glucose Monitoring Satisfactions in Type 1 Diabetes Using insulin pumps. *Clin Med Insights Endocrinol Diabetes.* 2019 Jul 1;12:1179551419861102. doi:10.1177/1179551419861102. eCollection 2019

37. Al Hayek AA, et al. Evaluation of FreeStyle Libre Flash Glucose Monitoring System on Glycemic Control, Health-Related Quality of Life, and Fear of Hypoglycemia in Patients with Type 1 Diabetes *Clin Med Insights Endocrinol Diabetes* 2017;10: doi: 10.1177/1179551417746957
38. Aravamudhan A, et al. Impact of continuous and flash glucose monitoring on HbA1c, quality of life indicators and hypoglycaemia confidence in children and young people with type 1 diabetes. *Pediatr Diabetes* October 2018; 19 (Suppl 26): 41–150 P103. doi:10.1111/pedi.12746
39. Boucher S, et al. Managing diabetes in a 'flash': Effect of 6 months' flash glucose monitoring in adolescents with high-risk glycaemic control-a randomised controlled trial. *Diabetes Technol & Ther.* Feb 2020.A-1-A-250. Volume: 22 Issue S1: February 18, 2020 194 / Abstract ID 471. doi:10.1089/dia.2020.2525.abstracts
40. Campbell FM, et al. Freestyle libre flash glucose monitoring system use in younger patients with diabetes under real life settings: reduction in HbA1c and hypoglycaemic exposure. *Diabetes Technol Ther.* 2019; 21: Suppl 1, ATTD19-0459 doi: 10.1089/dia.2019.2525.abstracts
41. Costigan C, et al. One year post-introduction of centrally-funded Flash Glucose Monitoring in paediatric type 1 diabetes: A regional centre's experience. *Arch Dis Child* 2019;104:A249. doi:10.1136/archdischild-2019-epa.583
42. Helm N, et al. Flash glucose monitoring improves perception and frequency of glucose monitoring leading to improved glucose control. *Pediatr Diabetes* October 2016; 17 (Suppl 24): 36–164. doi:10.1111/pedi.12451
43. Masel A, et al. Experience of using the Russified version of free style libre in children in the Russian Federation *Diabetes Technol & Ther.* Feb 2020.A-1-A-250 502 / Abstract ID 293 Volume: 22 Issue S1: February 18, 2020. doi:10.1089/dia.2020.2525.abstracts
44. Messaoui A, et al. Flash glucose monitoring in children-one-year experience. *Diabetes* 2018 Jul; 67(Suppl 1). doi:10.2337/db18-946-P
45. Quirós C, et al. Effectiveness of flash glucose monitoring in children and adolescents with type 1 diabetes. *Diabetes Technol & Ther.* Feb 2020.A-1-A-250 502 / Abstract ID 622 Volume: 22 Issue S1: February 18, 2020. doi:10.1089/dia.2020.2525.abstracts
46. Tirelli E, et al. Flash Glucose Monitoring in noncompliant children and adolescents with type 1 diabetes. *Diabetes Technol & Ther.* Feb 2017.A-1-A-133. doi:10.1089/dia.2017.2525.abstracts
47. Xatzipsalti M, et al. Flash Glucose monitoring system improves glycaemic control. *Pediatr Diabetes* October 2017; 18 (Suppl 25): 47–137 eP083. doi:10.1111/pedi.12589
48. Abdalaziz A, et al. Flash glucose monitoring (FGM) in people with Type 1 diabetes: Single centre-real-world experience. *Diab Med* 2018; 35: S1: 168. 2018 Diabetes UK Professional Conference, London, UK. doi: [https://dx.doi.org/10.1111/dme.48\\_13571](https://dx.doi.org/10.1111/dme.48_13571)
49. Bolinder J, et al. Novel glucose-sensing technology and hypoglycaemia in type 1 diabetes: a multicentre, non-masked, randomised controlled trial. *Lancet.* 2016;388: 2254-2263. doi:10.1016/S0140-6736(16)31535-5
50. Charleer S, et al. Quality of life and glucose control after 1 year of nationwide reimbursement of intermittently scanned continuous glucose monitoring in adults living with type 1 diabetes (FUTURE): A prospective observational real-world cohort study. *Diabetes Care.* 2020 Feb;43(2):389-397. doi:10.2337/dc19-1610.
51. Dørflinger GH, et al. The effect of flash glucose monitoring on glycemic control in patients with type 1 diabetes. *Diabetes* 2018 Jul; 67(Suppl 1). doi:10.2337/db18-942-P
52. Eeg-Olofsson K, et al. Real world study of freestyle libre system among adults with type 1 and type 2 diabetes within the Swedish national diabetes register. *Diabetes Technol & Ther.* Vol. 22, No. S1 178 / Abstract ID. doi:10.1089/dia.2020.2525.abstracts
53. Greve SV, et al. A pragmatic real-life study of flash glucose monitoring versus self-monitoring of blood glucose. *Dan Med J.* 2020 Jun 1;67(6):A07190404. <https://ugeskriftet.dk/dmj/pragmatic-real-life-study-flash-glucose-monitoring-versus-self-monitoring-blood-glucose>
54. Klausmann G, et al. Improving HbA1c Control in Type 1 or Type 2 Diabetes Using Flash Glucose Monitoring: A Retrospective Observational Analysis in Two German Centres. *Diabetes Ther.* 2021 Jan;12(1):363-372. doi:10.1007/s13300-020-00978-9

55. Löndahl M, Filipsson K, Lindholm E et al. Effect of Flash Glucose monitoring on metabolic control and self-esteem treatment satisfaction in people with T1DM. *Diabetes Technol Ther.* 2017, 19(S1). Poster 197, doi. 10.1089/dia.2017.2525.abstracts
56. Nana M, et al. Flash glucose monitoring: Impact on markers of glycaemic control and patient-reported outcomes in individuals with type 1 diabetes mellitus in the real-world setting. *Diabetes Res Clin Pract* 2019 Nov;157:107893. doi:10.1016/j.diabres.2019.107893
57. Paris I, et al. The new FreeStyle libre flash glucose monitoring system improves the glycaemic control in a cohort of people with type 1 diabetes followed in real-life conditions over a period of one year. *Endocrinol Diab Metab* 2018, doi: 10.1002/edm2.23
58. Rodia C, et al. Managing Trend Arrows with FGM: Effects on Glycemic Control in Type 1 Diabetic (T1DM) Subjects. *Diabetes* 2019 Jun; 68(Suppl 1). doi:10.1089/dia.2020.2525.abstracts
59. Rouhard S, et al. Evolution of glycemic control and quality of life of diabetic patients after using Flash glucose self-monitoring: A prospective study involving 248 patients. [www.louvainmedical.be/fr/article/evolution-de-lequilibre-glycemique-et-de-la-qualite-de-vie-du-patient-diabetique-apres](http://www.louvainmedical.be/fr/article/evolution-de-lequilibre-glycemique-et-de-la-qualite-de-vie-du-patient-diabetique-apres)
60. Tsur A, et al. Impact of flash glucose monitoring on glucose control and hospitalization in type 1 diabetes: A nationwide cohort study. *Diabetes Metab Res Rev* 2021 Jan;37(1):e3355. doi:10.1002/dmrr.3355
61. Ueno K, et al. Patient satisfaction and clinical efficacy of flash glucose monitoring in patients with type 1 diabetes. *Diabetes Ther.* 2020 Aug;11(8):1883-1890. doi:10.1007/s13300-020-00859-1
62. Yadegarfar G, et al. The FreeStyle Libre flash glucose monitoring system: how it has improved glycaemic control for people with type 1 diabetes in Eastern Cheshire, UK. *Cardiovasc Endocrinol Metab.* 2020 Dec; 9(4): 171–176. doi:10.1097/XCE.0000000000000216
63. Eeg-Olofsson K, et al. Real world study of freestyle libre system among adults with type 1 and type 2 diabetes within the Swedish national diabetes register. *Diabetes Technol & Ther.* Vol. 22, No. S1 178 / Abstract ID 688. doi:10.1089/dia.2020.2525.abstracts
64. Haak T, et al. Flash Glucose-Sensing Technology as a Replacement for Blood Glucose Monitoring for the Management of Insulin-Treated Type 2 Diabetes: A Multicenter, Open-Label Randomized Controlled Trial. *Diabetes Ther.* 2017; 8: 55-73. doi: 10.1007/s13300-016-0223-6. Epub 2016 Dec 20
65. Klausmann G, et al. Improving HbA1c Control in Type 1 or Type 2 Diabetes Using Flash Glucose Monitoring: A Retrospective Observational Analysis in Two German Centres. *Diabetes Ther.* 2021 Jan;12(1):363-372. doi:10.1007/s13300-020-00978-9
66. Miller E, et al. HbA1c Reduction after Initiation of the FreeStyle Libre System in Type 2 Diabetes Patients on Long-Acting Insulin or Noninsulin Therapy. *Diabetes* 2020 Jun; 69(Suppl 1): -.84-LB. doi:10.2337/db20-84-LB
67. Wada E, et al. Flash glucose monitoring helps achieve better glycemic control than conventional self-monitoring of blood glucose in non-insulin-treated type 2 diabetes: a randomized controlled trial. *BMJ Open Diabetes Res Care* 2020 Jun;8(1):e001115. doi:10.1136/bmjdr-2019-001115
68. Campbell F, et al. Freestyle libre flash glucose monitoring system use in younger patients with diabetes under real life settings: Reduction in HbA1c and hypoglycaemic exposure. *Diabetes Technol & Ther.* Feb 2019.A-1-A-164. 249 ATTD19-0459. doi:10.1089/dia.2019.2525.abstracts
69. Charleer S, et al. Quality of life and glucose control after 1 year of nationwide reimbursement of intermittently scanned continuous glucose monitoring in adults living with type 1 diabetes (FUTURE): A prospective observational real-world cohort study. *Diabetes Care.* 2020 Feb;43(2):389-397. doi:10.2337/dc19-1610
70. Landau Z, et al. Use of flash glucose-sensing technology (FreeStyle Libre) in youth with type 1 diabetes: AWeSoMe study group real-life observational experience. *Acta Diabetol.* 2018 Dec;55(12):1303-1310. doi:10.1007/s00592-018-1218-8
71. Leiva-Gea I, et al. Introduction of Flash Glucose Monitoring in Children with Type 1 Diabetes: Experience of a Single-Centre in Spain European Society for Pediatric Endocrinology 2019. ESPE Abstracts (2019) 92 LB-20. [https://abstracts.eurospe.org/hrp/0092/eposters/hrp0092lb-20\\_eposter.pdf](https://abstracts.eurospe.org/hrp/0092/eposters/hrp0092lb-20_eposter.pdf)

72. Piccoli C, et al. Evaluation of the metabolic control of chronically uncontrolled type 1 diabetes patients using the flash glucose monitoring followed by a quality of life and support program (PAQVIDA). *Diabetol Metab Syndr.* 2019, 11(Suppl 1):P114. doi:10.1186/s13098-019-0473-3
73. Pintus D, et al. FreeStyle Libre Flash glucose monitoring (Flash GM) system improves glycaemic control and patient quality of life measures in children with type 1 diabetes with appropriate provision of Flash GM education and support by healthcare professionals. *Diabetes Metab Syndr.* 2019;13:2923-2926. doi: 10.1016/j.dsx.2019.07.054.
74. Walton-Betancourth S, et al. A clinic-based study of the impact of flash glucose sensing technology on glycaemic control and self-monitoring of blood glucose in children and young people with type 1 diabetes. *Pediatric Diabetes* 2017, 18 (Suppl. 25): 47. Poster eP003, 43rd Annual Conference of the ISPAD, Oct. 18-21, 2017, Innsbruck, Austria.
75. Wijnands A, et al. The freestyle flash glucose monitoring system has limited effect on the metabolic control of children and adolescents with type 1 diabetes mellitus. *Pediatric Diabetes* 2017, 18 (Suppl. 25): 38, Poster O46, 43rd Annual Conference of the ISPAD, 18-21 October 2017, Innsbruck, Austria.
